# Supplementary material for: Drug-related problems among patients with infectious disease admitted to medical wards of Wollega University Referral Hospital: Prospective observational study
Source: PubMed Central journal article supplement — SAGE Open Med. 2021 Jan 22;9:2050312121989625. doi: 10.1177/2050312121989625 (PMC7841694; doi:10.1177/2050312121989625), 2021-01-22
Supplement: sj-pdf-1-smo-10.1177_2050312121989625.pdf [file sj-pdf-1-smo-10.1177_2050312121989625.pdf]

## ANNEXI: Data collection tool

### PART I. Socio-demographic and socio-economic status information

*Instruction1: This Question is about socio demographic characteristics of the patient. Encircle the response of the participants for close ended questions and write the response on the space provided for open ended questions.*

| No | Back ground information                               | Response                                                                                                                                                                                                     |
|----|-------------------------------------------------------|--------------------------------------------------------------------------------------------------------------------------------------------------------------------------------------------------------------|
| 01 | Age                                                   | ____ years                                                                                                                                                                                                   |
| 02 | Sex                                                   | 1. Male <input type="checkbox"/> 2. Female <input type="checkbox"/>                                                                                                                                          |
| 03 | Marital status                                        | 1. Married <input type="checkbox"/><br>2. Single <input type="checkbox"/><br>3. Divorced <input type="checkbox"/><br>4. Widowed <input type="checkbox"/>                                                     |
| 04 | Where did you live?                                   | 1.Rural <input type="checkbox"/><br>2.Urban <input type="checkbox"/>                                                                                                                                         |
| 05 | How much in average do you think your Monthly Income? | _____ Birr                                                                                                                                                                                                   |
| 06 | What is your educational level?                       | 1. Illiterate <input type="checkbox"/><br>2. grad1-8 <input type="checkbox"/><br>3. grade 9-12 <input type="checkbox"/><br>4. Dipiloma <input type="checkbox"/><br>5. Degree &above <input type="checkbox"/> |
| 07 | What is your occupation                               | 1. Farmer <input type="checkbox"/><br>2. Merchant/Trade <input type="checkbox"/>                                                                                                                             |

|  |  |                                                                                                                                                                                                       |
|--|--|-------------------------------------------------------------------------------------------------------------------------------------------------------------------------------------------------------|
|  |  | 3. Government employee <input type="checkbox"/><br>4. House wife <input type="checkbox"/><br>5. Student <input type="checkbox"/><br>6. Daily labor <input type="checkbox"/><br>7. Specify other _____ |
|--|--|-------------------------------------------------------------------------------------------------------------------------------------------------------------------------------------------------------|

**PART II. Nine Item The Hill-Bone Compliance to HBP Therapy Scale**

| S.N | questions                                                            | 1 | 2 | 3 | 4 |
|-----|----------------------------------------------------------------------|---|---|---|---|
| 1   | How often do you forget to take your HBP medicine?                   |   |   |   |   |
| 2   | How often do you decide NOT to take your HBP medicine?               |   |   |   |   |
| 3   | How often do you forget to get prescriptions filled?                 |   |   |   |   |
| 4   | How often do you run out of HBP pills?                               |   |   |   |   |
| 5   | How often do you skip your HBP medicine before you go to the doctor? |   |   |   |   |
| 6   | How often do you miss taking your HBP pills when you feel better?    |   |   |   |   |
| 7   | How often do you miss taking your HBP pills when you feel sick?      |   |   |   |   |
| 8   | How often do you take someone else's HBP pills?                      |   |   |   |   |
| 9   | How often do you miss taking your HBP pills when you are careless?   |   |   |   |   |

1=All of the time 2= Most of the time 3= Some of the time 4= none of the time

**PART III. Clinical and drug related characteristics of the patients**

**1. Patient medical conditions and medications**

Ward \_\_\_\_\_ chart code \_\_\_\_\_ diagnosis \_\_\_\_\_

\_\_\_\_\_

\_\_\_\_\_

\_\_\_\_\_

Patient Name (initials) \_\_\_\_\_ card no. \_\_\_\_\_ Age (yrs) \_\_\_\_\_ Sex \_\_\_\_\_

Wt. (kg) \_\_\_\_ if female Pregnancy Status: \_\_\_\_\_ Date of admission \_\_\_\_\_ Date the data taken \_\_\_\_\_

| No | Disease condition | Treatment | Dosage regimen<br>(dose,<br>route,<br>frequency,<br>duration) | Date<br>(dd/mm/yy) |             | Comment(DRP) |
|----|-------------------|-----------|---------------------------------------------------------------|--------------------|-------------|--------------|
|    |                   |           |                                                               | Started            | Stoppe<br>d |              |
| 1  |                   |           |                                                               |                    |             |              |
| 2  |                   |           |                                                               |                    |             |              |
| 3  |                   |           |                                                               |                    |             |              |
| 4  |                   |           |                                                               |                    |             |              |
| 5  |                   |           |                                                               |                    |             |              |
| 6  |                   |           |                                                               |                    |             |              |
| 7  |                   |           |                                                               |                    |             |              |
| 8  |                   |           |                                                               |                    |             |              |
| 9  |                   |           |                                                               |                    |             |              |
| 10 |                   |           |                                                               |                    |             |              |
| 11 |                   |           |                                                               |                    |             |              |
| 12 |                   |           |                                                               |                    |             |              |

**2. Vital signs of the patients (Findings, at least for three consecutive results).**

| Date | BP | RR | T | PR |
|------|----|----|---|----|
|      |    |    |   |    |
|      |    |    |   |    |
|      |    |    |   |    |

**3. Pertinent lab values (Findings, at least for three consecutive results).**

| Investigations       |               | Mesurement unit | Date |  |  |  |  | Normal range |
|----------------------|---------------|-----------------|------|--|--|--|--|--------------|
| S.No.                | Type          |                 |      |  |  |  |  |              |
| Serum Electrolytes   |               |                 |      |  |  |  |  |              |
| 1                    | Serum K       |                 |      |  |  |  |  |              |
| 2                    | Serum Na      |                 |      |  |  |  |  |              |
| 3                    | Serum iCa     |                 |      |  |  |  |  |              |
| 4                    | Serum Cl      |                 |      |  |  |  |  |              |
| 5                    | Serum Mg      |                 |      |  |  |  |  |              |
| Lipid profile        |               |                 |      |  |  |  |  |              |
| 1                    | TG            |                 |      |  |  |  |  |              |
| 2                    | TC            |                 |      |  |  |  |  |              |
| 3                    | HDL           |                 |      |  |  |  |  |              |
| 4                    | LDL           |                 |      |  |  |  |  |              |
| Liver function tests |               |                 |      |  |  |  |  |              |
| 1                    | AST           |                 |      |  |  |  |  |              |
| 2                    | ALT           |                 |      |  |  |  |  |              |
| 3                    | ALP           |                 |      |  |  |  |  |              |
| 4                    | PT            |                 |      |  |  |  |  |              |
| 5                    | INR           |                 |      |  |  |  |  |              |
| 6                    | APTT          |                 |      |  |  |  |  |              |
| 7                    | Total Bili    |                 |      |  |  |  |  |              |
| 8                    | Indirect Bili |                 |      |  |  |  |  |              |
| 9                    | Albumin       |                 |      |  |  |  |  |              |
| Renal function test  |               |                 |      |  |  |  |  |              |
| 1                    | Ketone        |                 |      |  |  |  |  |              |
| 2                    | Protein       |                 |      |  |  |  |  |              |
| 3                    | WBC           |                 |      |  |  |  |  |              |
| 4                    | Glucose       |                 |      |  |  |  |  |              |
| 5                    | RBC           |                 |      |  |  |  |  |              |
| 6                    | Uric acid     |                 |      |  |  |  |  |              |
| 7                    | Nitrites      |                 |      |  |  |  |  |              |
| 8                    | Scr           |                 |      |  |  |  |  |              |
| 9                    | BUN           |                 |      |  |  |  |  |              |
| CBC                  |               |                 |      |  |  |  |  |              |
| 1                    | WBC           |                 |      |  |  |  |  |              |
| 2                    | RBC           |                 |      |  |  |  |  |              |
| 3                    | PLT           |                 |      |  |  |  |  |              |
| 4                    | Hgb           |                 |      |  |  |  |  |              |
| 5                    | Hct           |                 |      |  |  |  |  |              |
| 6                    | Lymphocytes   |                 |      |  |  |  |  |              |
| 7                    | Neu           |                 |      |  |  |  |  |              |
| 8                    | ESR           |                 |      |  |  |  |  |              |
| Blood glucose        |               |                 |      |  |  |  |  |              |
| 1                    | FBS           |                 |      |  |  |  |  |              |

|   |       |  |  |  |  |  |  |  |
|---|-------|--|--|--|--|--|--|--|
| 2 | RBS   |  |  |  |  |  |  |  |
| 3 | HbA1C |  |  |  |  |  |  |  |

**4. Any other investigations/Diagnostic imaging results**

---



---



---



---

**5. Drug interaction**

5.1. Is there any drug interaction yes ..... no .....

5.2. If drug interaction is there specify it

---



---



---



---



---



---



---



---

**6. Relevant past Patient medical and medication history**

---



---



---



---



---



---



---



---



---



---

**PART IV. Naranjo Adverse drug reaction probability scale**

| S.N | Questions                                                                                                         | Yes | No | Do Not Know | score |
|-----|-------------------------------------------------------------------------------------------------------------------|-----|----|-------------|-------|
| 1   | Are there previous <i>conclusive</i> reports on this reaction?                                                    | +1  | 0  | 0           |       |
| 2   | Did the adverse event appear after the suspected drug was administered?                                           | +2  | -1 | 0           |       |
| 3   | Did the adverse reaction improve when the drug was discontinued or a <i>specific</i> antagonist was administered? | +1  | 0  | 0           |       |
| 4   | Did the adverse event reappear when the drug was re-administered?                                                 | +2  | -1 | 0           |       |
| 5   | Are there alternative causes (other than the drug) that could on their own have caused the reaction?              | -1  | +2 | 0           |       |
| 6   | Did the reaction reappear when all drugs were given?                                                              | -1  | +1 | 0           |       |
| 7   | Was the drug detected in blood (or other fluids) in concentrations known to be toxic?                             | +1  | 0  | 0           |       |
| 8   | Was the reaction more severe when the dose was increased or less severe when the dose was decreased?              | +1  | 0  | 0           |       |
| 9   | Did the patient have a similar reaction to the same or similar drugs in <i>any</i> previous exposure?             | +1  | 0  | 0           |       |
| 10  | Was the adverse event confirmed by any objective evidence?                                                        | +1  | 0  | 0           |       |

**ANNEX II: DRP registration format**

**TYPE OF PROBLEM**

**Drug therapy problem 1: Unnecessary drug therapy**

There is no valid medical indication for the drug therapy at this time

Multiple drug products are being used for a condition that requires single drug therapy

The medical condition is more appropriately treated with nondrug therapy

Drug therapy is being taken to treat an avoidable adverse reaction associated with another Medication

Drug abuse, alcohol use, or smoking is causing the problem

### **Drug Therapy Problem 2: Needs Additional Drug Therapy**

A medical condition requires the initiation of drug therapy

Preventive drug therapy is required to reduce the risk of developing new condition

The medical condition requires additional pharmacotherapy to attain synergistic or additive Effects

### **Drug Therapy Problem 3: Ineffective Drug**

The drug product is not the most effective for the indication being treated

The medical condition is refractory to the drug product

The dosage form of the drug product is inappropriate

The drug is not effective for the medical problem

### **Drug therapy problem 4: Inappropriate dose**

The dose is too low to produce the desired response.

The dosage interval is too infrequent to produce the desired response.

The duration of drug therapy is too short to produce the desired response

Dose is too high

The dosing frequency is too short

The duration of drug therapy is too long

### **Drug Therapy Problem 5: Adverse Drug Reaction**

The drug product causes an undesirable reaction that is not dose-related

A safer drug product is required due to risk factors

A drug interaction causes an undesirable reaction that is not dose-related

The dosage regimen was administered or changed too rapidly

The drug product causes an allergic reaction

The drug product is contraindicated due to risk factor

### **Drug Therapy Problem 6: Drug interaction**

Presence of major drug interaction among the medications
